# Supplementary material
Source: PubMed Central journal article supplement (PMC4386069)

Control □  
Zymosan ■

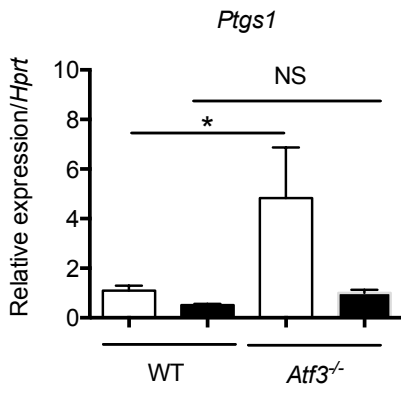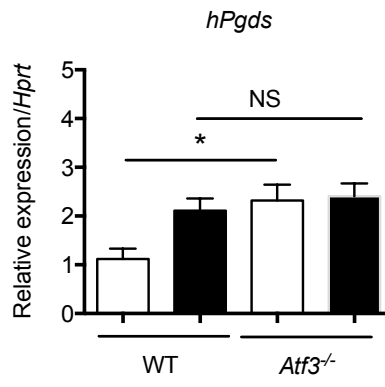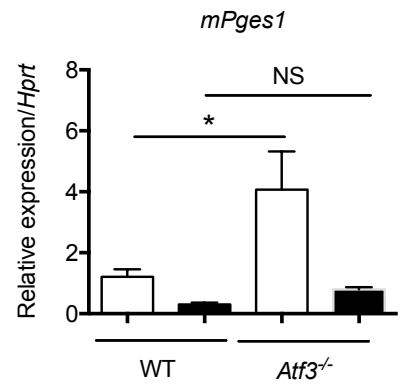

Supplement: NIHMS657786-supplement.pdf [file NIHMS657786-supplement.pdf]
